# Supplementary material for: Future heat stress to reduce people’s purchasing power
Source: PLOS journal article supplement (doi:10.1371/journal.pone.0251210), 2021-06-10
Supplement: S7 (10.1371/journal.pone.0251210.s007) [file journal.pone.0251210.s007]

**S3 Table. Consumption price elasticities per income level and sector category.**  
Values are based on GTAP.

| Sector category | Income level |      |      |       |
|-----------------|--------------|------|------|-------|
|                 | 1            | 2    | 3    | 4     |
| vital           | -0.15        | -0.2 | -0.3 | -0.45 |
| relevant        | -0.2         | -0.3 | -0.4 | -0.65 |
| other           | -0.3         | -0.4 | -0.5 | -0.75 |
